1 **Evidence for gene-environment correlation in child feeding: Links between**  
2 **common genetic variation for BMI in children and parental feeding practices**

3

4 **Authors**

5 Saskia Selzam<sup>1</sup>, Tom A. McAdams<sup>1</sup>, Jonathan R. I. Coleman<sup>1,2</sup>, Susan Carnell<sup>3</sup>,  
6 Paul F. O'Reilly<sup>1</sup>, Robert Plomin<sup>1</sup>, Clare H. Llewellyn<sup>4</sup>

7

8 **Affiliations**

9 <sup>1</sup>King's College London, MRC Social, Genetic and Developmental Psychiatry Centre,  
10 Institute of Psychiatry, Psychology and Neuroscience, London. SE5 8AF, UK.

11

12 <sup>2</sup>NIHR Biomedical Research Centre for Mental Health; South London and Maudsley NHS  
13 Trust; London SE5 8AF; UK

14

15 <sup>3</sup>Department of Psychiatry and Behavioral Sciences, Division of Child and Adolescent  
16 Psychiatry, Johns Hopkins University School of Medicine, Baltimore, MD

17

18 <sup>4</sup>Department of Behavioural Science and Health, University College London, London, WC1E  
19 7HB

20

21

22 **Corresponding authors**

23 Clare Llewellyn: c.llewellyn@ucl.ac.uk

24 Saskia Selzam: saskia.selzam@kcl.ac.uk

25

## 26 Abstract

27 The parental feeding practices (PFPs) of excessive restriction of food intake  
28 ('restriction') and pressure to increase food consumption ('pressure') have been  
29 argued to causally influence child weight in opposite directions (high restriction  
30 causing *overweight*, high pressure causing *underweight*). However child weight  
31 could also 'elicit' PFPs. A novel approach is to investigate gene-environment  
32 correlation between child genetic influences on BMI and PFPs. Genome-wide  
33 polygenic scores (GPS) combining BMI-associated variants were created for 10,346  
34 children (including 3,320 DZ twin pairs) from the Twins Early Development Study  
35 using results from an independent genome-wide association study meta-analysis.  
36 Parental 'restriction' and 'pressure' were assessed using the Child Feeding  
37 Questionnaire. Child BMI standard deviation scores (BMI-SDS) were calculated from  
38 children's height and weight at age 10. Linear regression and fixed family effect  
39 models were used to test between- (n=4,445 individuals) and within-family (n=2,164  
40 DZ pairs) associations between the GPS and PFPs. In addition, we performed  
41 multivariate twin analyses (n=4,375 twin pairs) to estimate the heritabilities of PFPs  
42 and the genetic correlations between BMI-SDS and PFPs. The GPS was correlated  
43 with BMI-SDS ( $\beta=0.20$ ,  $p=2.41 \times 10^{-38}$ ). Consistent with the gene-environment  
44 correlation hypothesis, child BMI GPS was positively associated with 'restriction'  
45 ( $\beta=0.05$ ,  $p=4.19 \times 10^{-4}$ ), and negatively associated with 'pressure' ( $\beta=-0.08$ ,  
46  $p=2.70 \times 10^{-7}$ ). These results remained consistent after controlling for parental BMI,  
47 and after controlling for overall family contributions (within-family analyses).  
48 Heritabilities for 'restriction' (43% [40-47%]) and 'pressure' (54% [50-59%]) were  
49 moderate-to-high. Twin-based genetic correlations were moderate and positive  
50 between BMI-SDS and 'restriction' ( $r_A=0.28$  [0.23-0.32]), and substantial and

51 negative between BMI-SDS and 'pressure' ( $r_A = -0.48$  [-0.52 - -0.44]. Results  
52 suggest that the degree to which parents limit or encourage children's food intake is  
53 partly influenced by children's genetic predispositions to higher or lower BMI. These  
54 findings point to an evocative gene-environment correlation in which heritable  
55 characteristics in the child elicit parental feeding behaviour.

## 56 Author Summary

57

58 It is widely believed that parents influence their child's BMI via certain feeding  
59 practices. For example, rigid restriction has been argued to cause *overweight*, and  
60 pressuring to eat to cause *underweight*. However, recent longitudinal research has  
61 not supported this model. An alternative hypothesis is that child BMI, which has a  
62 strong genetic basis, evokes parental feeding practices ('gene-environment  
63 correlation'). To test this, we applied two genetic methods in a large sample of 10-  
64 year-old children from the Twins Early Development Study: a polygenic score  
65 analysis (DNA-based score of common genetic variants robustly associated with BMI  
66 in genome-wide meta-analyses), and a twin analysis (comparing resemblance  
67 between identical and non-identical twin pairs). Polygenic scores correlated  
68 positively with parental restriction of food intake ('restriction';  $\beta=0.05$ ,  $p=4.19 \times 10^{-4}$ ),  
69 and negatively with parental pressure to increase food intake ('pressure';  $\beta=-0.08$ ,  
70  $p=2.70 \times 10^{-7}$ ). Associations were unchanged after controlling for all genetic and  
71 environmental effects shared within families. Results from twin analyses were  
72 consistent. 'Restriction' (43%) and 'pressure' (54%) were substantially heritable, and  
73 a positive genetic correlation between child BMI and 'restriction' ( $r_A=0.28$ ), and  
74 negative genetic correlation between child BMI and 'pressure' ( $r_A=-0.48$ ) emerged.  
75 These findings challenge the prevailing view that parental behaviours are the sole  
76 cause of child BMI by supporting an alternate hypothesis that child BMI also causes  
77 parental feeding behaviour.

## 78 Introduction

79

80 The home and family environment has been studied for decades with the  
81 assumption that it is a crucial determinant of children's health and development.  
82 Since the onset of the childhood obesity crisis at the turn of the century, the spotlight  
83 has turned onto environmental factors associated with variation in adiposity, in the  
84 hope that modifiable elements may be identified as intervention targets. Perhaps  
85 unsurprisingly, parental behaviours have received a great deal of attention. Parents  
86 are widely considered to be the 'gatekeepers' to their children's food, and powerful  
87 shapers of their developing eating behaviour<sup>1-3</sup>. Two parental feeding practices  
88 (PFPs) in particular have been hypothesised to play a causal role in children's ability  
89 to develop good self-regulation of food intake and consequently determine their  
90 weight. Excessive restriction of the type and amount of food a child is allowed to eat  
91 ('restriction') has been hypothesised to lead to overeating when parental restriction is  
92 no longer in place, because the child will potentially then hanker after the foods he or  
93 she is not usually allowed to eat – the so-called 'forbidden fruit effect'<sup>1,4,5</sup>. On the  
94 other hand, overly pressuring a child to eat, or to finish everything on the plate  
95 ('pressure'), is thought to be anxiety-provoking for a child with a poor appetite, and  
96 serves only to increase undereating further, and compromise weight gain<sup>6,7</sup>.

97

98 A wealth of cross-sectional findings are consistent with these hypotheses<sup>8</sup>, but  
99 another plausible explanation for the observed correlations is that parents are  
100 responding to their child's emerging characteristics, rather than causing them.  
101 Parents may only adopt restrictive strategies when a child shows a tendency toward  
102 overeating, or gains excessive weight; and they may pressure their child to eat only if

103 he or she is a poor eater, or underweight. The few longitudinal studies testing  
104 bidirectionality have shown that children's weight prospectively predicts PFPs<sup>9-13</sup>.  
105 Furthermore, three studies showed no prospective association from PFPs to child  
106 weight<sup>10</sup>, and the studies reporting bidirectional relationships found stronger  
107 associations from child weight to parental behaviour than the reverse direction<sup>9,11</sup>.  
108 Although these findings point towards children's weight eliciting PFPs, the possibility  
109 of residual confounding in observational studies hinders conclusions about causation  
110 – temporality does not necessarily mean causality.

111

112 Testing whether children genuinely cause their parents' behaviour presents  
113 challenges. It is not possible – practically or ethically – to randomise children to be  
114 overweight or underweight, and examine how parents respond. Genetic approaches  
115 provide a powerful alternative method of interrogating the role of children in causing  
116 their parents' behaviour towards them, especially for child characteristics with an  
117 established genetic basis. To date, no study has applied genetically sensitive  
118 methods to test for gene-environment correlation in parental feeding behaviour.  
119 Family and twin studies have shown that Body Mass Index (BMI), is highly heritable  
120 in both adulthood and late childhood (~80%)<sup>14-16</sup>. Twin designs can therefore be  
121 used to test if parental behaviour has a heritable component, by comparing within-  
122 pair resemblance for identical and fraternal twin pairs in childhood. If found, this  
123 indicates that parental behaviour is explained to some extent by variation in  
124 children's genotype – termed evocative gene-environment correlation<sup>17</sup>. Twin  
125 designs can also be extended to the analysis of multiple variables to establish if  
126 genetic influence on a particular child characteristic (e.g. weight) also predicts the  
127 parental behaviour of interest (e.g. PFPs). If such analyses show that a child

128 characteristic is genetically correlated with parenting traits, it indicates that these  
129 child characteristics influence parenting behaviours. A meta-analysis of 32 twin  
130 studies of different types of parenting behaviour reported an average heritability  
131 estimate of 23%, indicating that children's genotype is predictive of a moderate  
132 amount of variation in parental behaviour<sup>18</sup>.

133

134 Children's DNA can also be used to test for gene-environment correlation. Genome-  
135 wide meta-analyses have made great progress in identifying common single  
136 nucleotide polymorphisms (SNPs) that are robustly associated with body mass index  
137 (BMI) in adults and children<sup>19</sup>. These can be combined to calculate a genome-wide  
138 polygenic score (GPS) that indexes individual-specific propensity to higher or lower  
139 BMI, along a continuum, although in the aggregate the GPS explains only a small  
140 proportion of variance in BMI (approximately 3%). Nevertheless, children's BMI GPS  
141 can therefore be used to test the hypothesis that parents develop their feeding  
142 practices specifically in response to their child's weight, as indicated by a correlation  
143 between child BMI GPS and PFPs. Unlike for other correlations, a possible  
144 interpretation for associations between differences in DNA sequence and parental  
145 behaviour is genetic causation, because DNA sequence variation cannot be caused  
146 by parental behaviour. A caveat to this is that a parent's feeding practices may  
147 reflect their own genetic predisposition to be of a higher or lower BMI, rather than  
148 that of their children. In this way, a correlation between child BMI GPS and PFPs  
149 may simply reflect a child's genetic predisposition to be of a higher or lower BMI,  
150 which they inherit from their parent with whom they share 50% of their DNA. In  
151 addition, genetic effects related to adult BMI discovered in genome-wide association  
152 studies could potentially incorporate effects of PFPs if they were to causally

153 influence child BMI, and its trajectory into adulthood. However, within-family designs  
154 can circumvent both of these limitations to some extent. Studying variation in PFPs  
155 according to variation in BMI GPS within co-twins accounts for both genetic and  
156 environmental shared effects within families (e.g. parental genetic predisposition to  
157 be of higher or lower BMI). By applying both quantitative and molecular genetic  
158 methods, and utilising statistical approaches to account for family effects, we  
159 intended to address the various limitations presented by the individual methods.

160

161 The goals of this study were to test for gene-environment correlation between  
162 children's BMI and PFPs, using a twin design and a BMI GPS. We hypothesised  
163 that: (i) children's BMI GPS would be positively associated with parental restriction  
164 and negatively associated with parental pressure, even after accounting for shared  
165 genetic and environmental family influences, and (ii) parental restriction and parental  
166 pressure would be moderately heritable, and that genetic influence on PFPs would  
167 be partly explained by genetic influence on children's BMI.



## 168 Results

### 169 Phenotypic correlations

170

171 Child BMI-SDS was significantly positively correlated with 'restriction' ( $\beta = 0.19$ ,  
172  $t(4004) = 12.09$ ,  $p = 4.45 \times 10^{-33}$ ,  $R^2 = 0.035$ ), such that parents were more restrictive  
173 over their child's food intake where the child had a higher BMI. In contrast, child BMI-  
174 SDS was significantly negatively correlated with 'pressure' ( $\beta = -0.24$ ,  $t(4058) =$   
175  $-15.59$ ,  $p = 3.14 \times 10^{-53}$ ,  $R^2 = 0.056$ ), where parents exerted higher amounts of  
176 pressure on their child to eat, if their child was leaner. 'Restriction' and 'pressure'  
177 were significantly positively correlated ( $\beta = 0.15$ ,  $t(4207) = 9.51$ ,  $p = 3.08 \times 10^{-21}$ ,  $R^2 =$   
178  $0.021$ ), suggesting that parents who tend to exert higher levels of 'restriction' also  
179 have a more pressuring feeding style, to some extent.

180

### 181 Genome-wide Polygenic Score (GPS) analyses

182

183 In our sample of unrelated individuals, child BMI GPS was positively correlated with  
184 child BMI-SDS ( $\beta = 0.20$ ,  $t(4226) = 13.08$ ,  $p = 2.41 \times 10^{-38}$ ,  $R^2 = 0.039$ ). Mirroring  
185 phenotypic results for child BMI-SDS, children's BMI GPS was significantly positively  
186 correlated with 'restriction' ( $\beta = 0.05$ ,  $t(4255) = 3.53$ ,  $p = 4.19 \times 10^{-4}$ ,  $R^2 = 0.003$ ), and  
187 significantly negatively correlated with 'pressure' ( $\beta = -0.08$ ,  $t(4315) = -5.15$ ,  $p =$   
188  $2.70 \times 10^{-7}$ ,  $R^2 = 0.006$ ) (Fig 1). These findings indicate that children's genetic  
189 predisposition to higher BMI, elicits, to some extent, restrictive feeding behaviours in  
190 the parent; whereas children's genetic predisposition to lower BMI elicits greater  
191 pressure to eat by parents.

192

193 Parental BMI correlated positively with child BMI-SDS ( $\beta = 0.26$ ,  $t(3761) = 17.00$ ,  $p =$   
194  $1.57 \times 10^{-62}$ ,  $R^2 = 0.071$ ) and 'restriction' ( $\beta = 0.08$ ,  $t(3711) = 4.64$ ,  $p = 3.65 \times 10^{-6}$ ,  $R^2 =$   
195  $0.005$ ), but was not significantly associated with 'pressure' ( $\beta = -0.03$ ,  $t(3757) =$   
196  $-1.68$ ,  $p = 0.09$ ,  $R^2 < 0.001$ ). The magnitude and direction of effects remained  
197 identical after controlling for parental BMI in 'restriction' ( $\beta = 0.05$ ,  $t(3711) = 2.92$ ,  $p =$   
198  $3.48 \times 10^{-3}$ ,  $R^2 = 0.003$ ) and in 'pressure' ( $\beta = -0.08$ ,  $t(3757) = -4.62$ ,  $p = 3.97 \times 10^{-6}$ ,  
199  $R^2 = 0.005$ ).

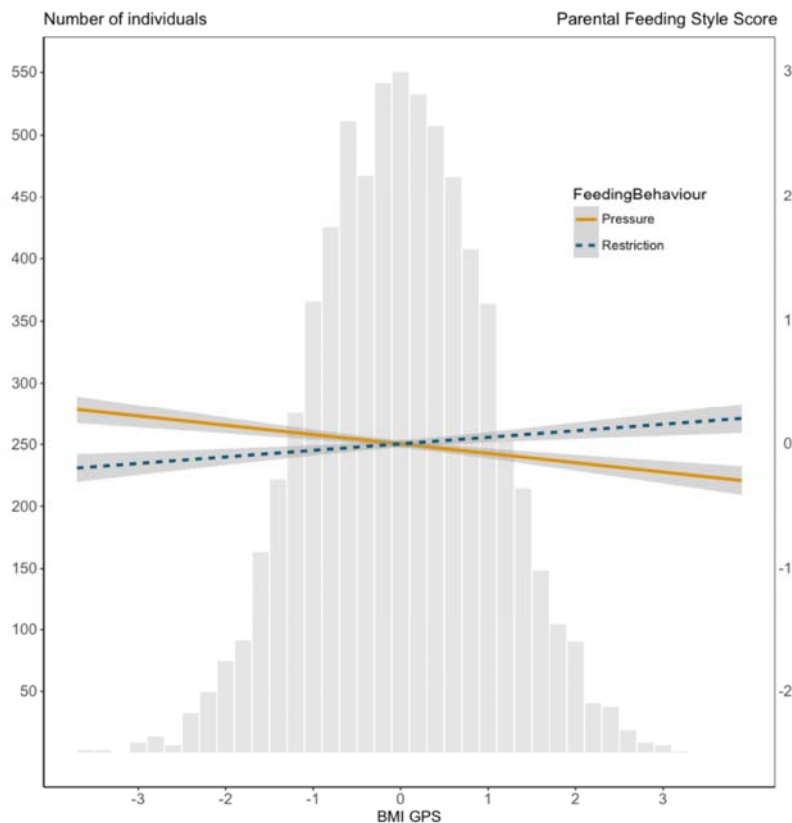

200

201 **Fig 1. The associations between child BMI polygenic score and parental**  
202 **feeding practices.**

203 Child BMI GPS predicting standardized measures of parental ‘restriction’ ( $\beta = 0.05$ ,  $p$   
204  $= 4.19 \times 10^{-4}$ ) and parental ‘pressure’ ( $\beta = -0.08$ ,  $p = 2.70 \times 10^{-7}$ ) as indicated by the  
205 best-fit regression lines. The grey areas surrounding the best-fit lines represent  
206 standard errors of the prediction estimates. The histogram depicts the BMI GPS  
207 normal distribution.

208

### 209 Within-family analyses

210

211 To establish the association between children’s BMI GPS and PFPs entirely without  
212 confounding by genetic and environmental family factors shared by twin pairs, we  
213 performed family fixed effect analyses in DZ co-twins. This analysis examined the  
214 extent to which parents vary their ‘restriction’ and ‘pressure’ across twin pairs in  
215 response to differences in their BMI GPSs. As shown in Fig 2, beta coefficients for  
216 BMI GPS predicting PFPs remained largely stable when comparing unrelated  
217 individuals (Model 1) and DZ twin pairs (Model 2). For unrelated individuals (Model  
218 1) child BMI-SDS significantly positively predicted ‘restriction’ and significantly  
219 negatively predicted ‘pressure’, as previously reported. The magnitude of the within-  
220 family estimates for the combined (same-sex and opposite-sex) DZ co-twins (Model  
221 2) were virtually the same as those for the unrelated individuals for the relationships  
222 between BMI GPS and ‘restriction’ ( $t(2054) = 3.50$ ,  $p = 7.10 \times 10^{-3}$ ,  $Adj. R^2_{model} =$   
223  $0.724$ ) and BMI GPS and ‘pressure’ ( $t(2103) = -4.82$ ,  $p = 1.52 \times 10^{-6}$ ,  $Adj. R^2_{model} =$   
224  $0.641$ ) ( $R^2$  magnitudes for Model 2 are large because all shared factors among family  
225 members, including genetic and environmental influences, are accounted for). These  
226 findings indicate that even when shared family effects are completely accounted for,  
227 children’s BMI GPS is significantly associated with PFPs, providing additional

228 evidence that children's genetic predisposition to BMI evokes certain parental  
229 feeding responses. When repeating Model 2 analyses separately for same-sex and  
230 opposite-sex DZs, magnitudes of effect sizes (Fig 2) remained consistent for the  
231 prediction of 'pressure' in same-sex DZ pairs ( $t(1118) = -3.36, p = 8.02 \times 10^{-4}, Adj. R^2_{model} = 0.607$ ) and opposite-sex DZ pairs ( $t(984) = -3.49, p = 5.12 \times 10^{-4}, Adj. R^2_{model} = 0.678$ ). Although BMI GPS in opposite-sex DZs was a significant predictor of  
234 within-family differences in 'restriction' ( $t(966) = 3.76, p = 1.82 \times 10^{-4}, Adj. R^2_{model} = 0.731$ ), same-sex DZ data did not show a significant within-family association  
236 ( $t(1087) = 1.21, p = 0.23, Adj. R^2_{model} = 0.719$ ), indicating that within a family  
237 environment, GPS differences in BMI between same-sex DZ twins are not related to  
238 differences in parental 'restriction'.

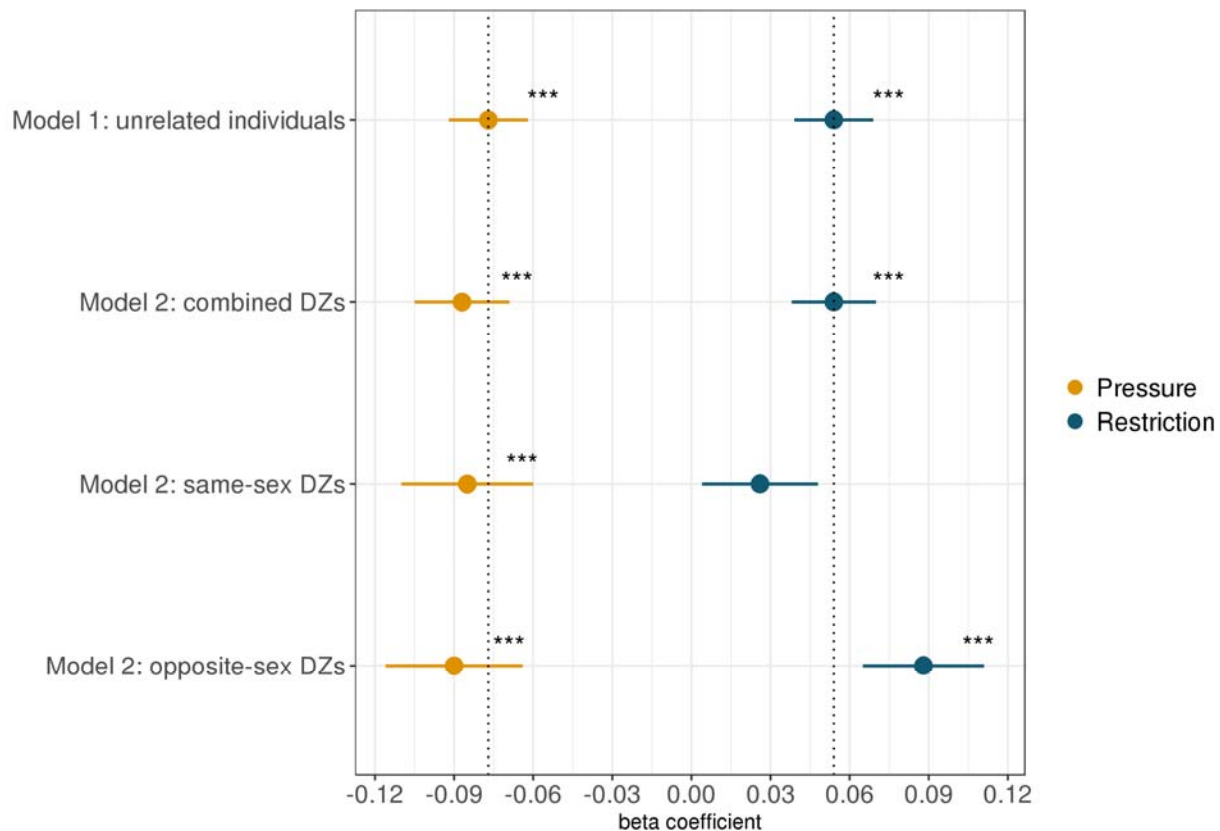

240 **Fig 2. Contrasting results from between-family analyses to results from within-**  
241 **family analyses.**

242 Model 1 describes results using BMI GPS of unrelated individuals to predict PFPs,  
243 where  $\beta_{GPS}$  indicates the change in the outcome trait per one standard deviation  
244 increase in the BMI GPS. Model 2 summarises results using BMI genome-wide  
245 polygenic scores in a sample of DZ co-twins using a family fixed effects model,  
246 where  $\beta_{GPS}$  indicates the increase in PFPs within DZ pairs, per one standard  
247 deviation increase in BMI GPS within DZ pairs. Model 2 analyses were performed  
248 using the combined DZ sample, and same-sex DZ pairs and opposite-sex DZ pairs  
249 only. The dotted lines represent the beta coefficient estimates for Model 1. \* =  
250  $p < 0.05$ ; \*\* =  $p < 0.01$ ; \*\*\* =  $p < 0.001$ .

251

252

253 **Twin analyses**

254

255 We performed multivariate genetic analyses (a correlated factors model) to establish  
256 the heritability of 'restriction' and 'pressure' and to test the extent to which genetic  
257 influence on child BMI-SDS elicited PFPs as indicated by the magnitude of genetic  
258 correlations between BMI, 'restriction', and 'pressure'. Fig 3 shows the variance  
259 components (A, C and E) for each measured phenotype, as well as the genetic,  
260 shared environmental and non-shared environmental correlations between  
261 phenotypes derived from the correlated factors model (see Supplementary Table S4  
262 for fit statistics and model comparisons, and Supplementary Table S3 for intra-class  
263 correlations). Heritability estimates (A) were moderate to high for parental 'restriction'  
264 (43%, 95% CI [40%, 47%]) and parental 'pressure' (54%, 95% CI [50%, 59%]);

265 heritability of child BMI-SDS was high (78%, 95% CI [72%, 84%]). Consistent with  
266 the findings from the GPS analyses, there was a significant, positive moderately  
267 sized genetic correlation between child BMI-SDS and parental 'restriction' ( $r_A=0.28$ ,  
268 95% CI [0.23, 0.32]), indicating that some of the genetic effects that predispose a  
269 child to a higher BMI also elicit more food restriction by their parent. A sizeable  
270 significant negative genetic correlation was observed between child BMI-SDS and  
271 parental 'pressure' ( $r_A=-0.48$ , 95% CI [-0.52, -0.44]), indicating that many of the  
272 genetic effects that predispose a child to a lower BMI elicit greater parental pressure  
273 on the child to eat.

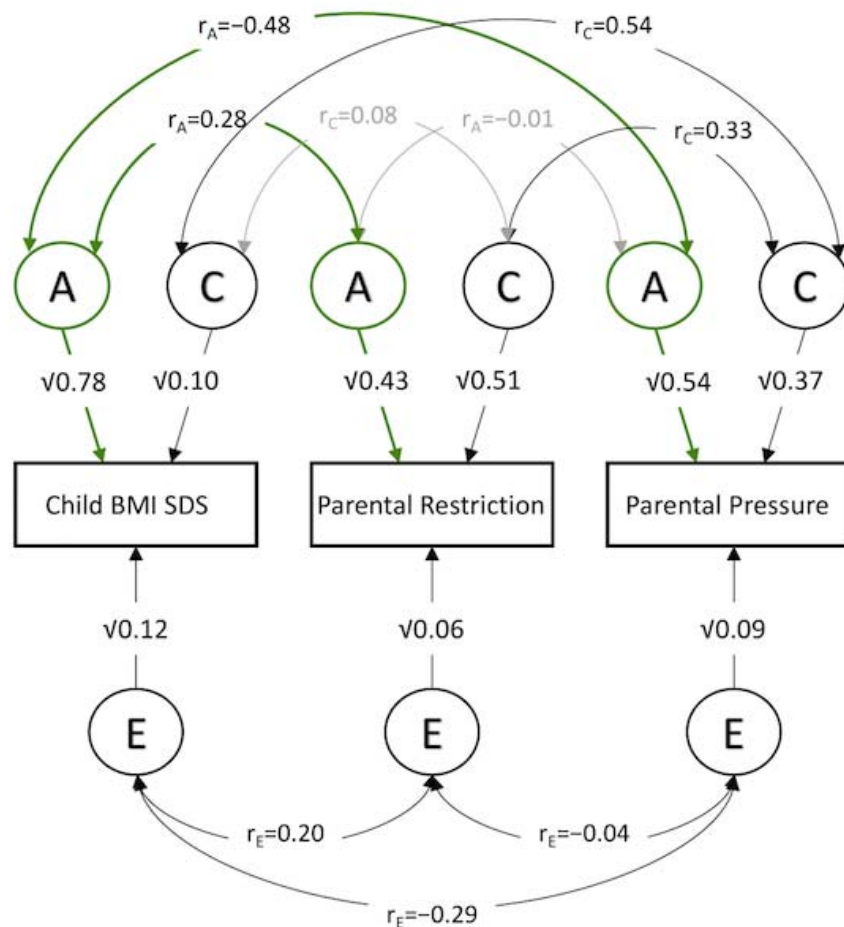

274

275 **Fig 3. The correlated factors model.**

276 A correlated factors model (males and females combined) showing: (i) the genetic  
277 (A), shared environmental (C) and non-shared environmental (E) influences on child  
278 BMI SDS, parental restriction and pressure; and (ii) common genetic ( $r_A$ ), shared  
279 environmental ( $r_C$ ) and non-shared environmental ( $r_E$ ) correlations between child  
280 BMI, and parental restriction and pressure. Grey arrows indicate non-significant  
281 associations. Correlations including the 95% confidence intervals can be found in  
282 Supplementary Table S5.

283

## 284 Discussion

285

### 286 Summary of findings

287

288 We describe the first study to test for gene-environment correlation for parental  
289 feeding behaviour in relation to child weight, using a twin design and children's DNA.  
290 Results support our hypothesis that parents' feeding practices are evoked, in part, by  
291 their children. Parental 'restriction' and 'pressure' were positively and negatively  
292 associated with child BMI respectively, in keeping with many previous cross-  
293 sectional studies<sup>8</sup>. We applied novel genetic methods to show for the first time that  
294 children's BMI GPS was significantly positively associated with 'restriction' and  
295 negatively associated with 'pressure', even after accounting for the potentially  
296 confounding shared familial effects (both genetic and environmental). This suggests  
297 that children's genetic influence on weight causally explains part of the observed  
298 phenotypic associations. Our twin analysis provided quantitative estimates of the  
299 total variance in parental feeding practices explained by children's genotype.  
300 Heritability was substantial for both 'restriction' (43%) and 'pressure' (54%),  
301 indicating that children's genes explain about half of the variation in parental feeding  
302 behaviour. Multivariate twin analysis established the extent to which parental feeding  
303 behaviour was determined by children's genetic influence on BMI *specifically*. The  
304 genetic correlations between children's BMI and both 'restriction' ( $r_A=0.28$ ) and  
305 pressure ( $r_A=-0.48$ ) were moderate, indicating overlap between the genes that  
306 influence parental feeding behaviour and children's BMI.

307



308 A potential confounder of the association between child GPS and parental feeding  
309 behaviour, was the parent's own genetic propensity to a higher or lower BMI.  
310 Children inherit half of each of their parents' genetic material, so the expected  
311 correlation between a child's GPS with that of their parent's is 0.50. A parent's  
312 genetic predisposition to be of a higher or lower BMI may also influence the way they  
313 feed their children, which could introduce a passive (rather than 'evocative') gene-  
314 environment correlation. For example, a parent with a higher BMI may be more  
315 restrictive over their child's food intake, but their child also inherits their parent's  
316 susceptibility to be of a higher BMI – restrictive feeding may therefore simply be a  
317 marker for a child's genetic predisposition to be of a higher BMI that is transmitted to  
318 them by their parent, rather than a causal risk factor (the same could be true for a  
319 more pressuring feeding style and lower BMI). In line with this, parental BMI  
320 (indexing parental GPS) was significantly positively associated with parental  
321 restriction indicating that parents of a higher weight exert greater restriction over their  
322 children's food intake ( $\beta = 0.08$ ); although the association with parental pressure was  
323 not significant. Adjustment for parental BMI did not attenuate the associations  
324 between child GPS and either restriction or pressure, suggesting it was not  
325 confounding the relationship between parental feeding behaviour and child BMI  
326 GPS. Nevertheless, adjustment for parental BMI cannot completely remove  
327 confounding from parental BMI, nor can it account for the potential effect of longer-  
328 term BMI on parental feeding behaviours. However, in order to rule out confounding  
329 by any parental characteristics (both genetic and environmental), we took advantage  
330 of a family fixed-effect design, which held the effects of family constant while testing  
331 the association between the child BMI GPS and parental feeding practices in DZ co-  
332 twins. The within-family analysis allowed us to demonstrate that even after

333 accounting for all familial effects, parents vary their feeding behaviour for each child  
334 depending on their GPS – larger GPS differences between pairs were associated  
335 with more pronounced differences in parental feeding behaviour. The magnitudes of  
336 the between- and within-family associations between parental feeding behaviour and  
337 child GPS were virtually the same, with the exception of the relationship between  
338 child GPS and ‘restriction’ in same-sex twins, strengthening the evidence that  
339 children evoke parental responses based on their genetic predispositions for BMI.  
340 Nevertheless, as expected and in keeping with the small amount of variance in  
341 explained in BMI by the GPS, the size of the associations between the BMI GPS and  
342 PFPs were small.

343

#### 344 **Other relevant research**

345

346 The findings from this study accord with those from twin studies of many other types  
347 of parenting behaviours that have also tended to show moderate heritability. A meta-  
348 analysis of 32 child twin studies on maternal positivity, negativity, affect and control  
349 in relation to parenting showed an average heritability of 24%<sup>18</sup>, indicating  
350 widespread, child-driven genetic influences on parental behaviour. The heritability  
351 estimates for ‘restriction’ (43%) and ‘pressure’ (54%) were somewhat higher than the  
352 average heritability estimate for the parenting styles considered in the meta-analysis  
353 (24%), but in keeping with the magnitude of the heritability of negative parenting  
354 styles observed across early childhood (~55%)<sup>20</sup>.

355

356 Despite providing evidence for gene-environment correlation, the design of our study  
357 was not able to shed light on the reverse causal direction – the influence of PFPs on

358 child weight. The few prospective studies that have attempted to establish the cause-  
359 effect relationship in the parent-child dynamic using bidirectional analyses have  
360 suggested either only a small effect of restriction and/or pressure on child weight, or  
361 none<sup>9-11,13</sup>. Prospective studies therefore suggest that PFPs may be less important  
362 than is commonly assumed. The well-established strong genetic influence on  
363 children's weight – in the order of 70-80%<sup>15,16</sup> – also supports the hypothesis that  
364 parents influence child weight via genetic inheritance more than by creating an  
365 'obesogenic' family environment. However, it cannot be ruled out that genetic effects  
366 related to BMI in the parents also contribute to an obesogenic environment if gene-  
367 environment correlation was at play, further passively reinforcing the child's inherited  
368 genetic propensities. The shared environmental influence on BMI in late childhood is  
369 also low<sup>15,16</sup>. In the current study, the shared environmental influence on parental  
370 feeding behaviour was the proportion of variance that was common to both twins in a  
371 pair (invariant within families). It therefore likely reflects variation in feeding  
372 behaviour that was parent-driven rather than child-directed. These estimates  
373 indicated that a substantial proportion of variation in both 'restriction' (C=43%) and  
374 'pressure' (C=37%) were also parent-origin.

375

376 Experimental studies in the form of large well-designed randomised controlled trials  
377 (RCTs) are needed to truly test the hypothesis that PFPs causally modify children's  
378 weight gain trajectories. Very few of these have been conducted to date, and they  
379 have focused on the preschool years. Nevertheless, two landmark studies have  
380 indicated that parental behaviour may, in fact, be influential in early life. NOURISH<sup>21</sup>  
381 was an Australian RCT that randomised 352 parents and infants to receive a feeding  
382 intervention (including using low amounts of pressure, and employing child-

383 responsive methods of food restriction) during the period of complementary feeding;  
384 346 families were randomised to the standard care control group. At three to four  
385 years of age, children in the intervention group had better appetite control than those  
386 in the control group, and there were fewer overweight children; although this did not  
387 reach statistical significance<sup>22</sup>. INSIGHT<sup>23</sup>, a US RCT, randomised 145 new  
388 mothers to a responsive parenting intervention that focused on feeding infants only  
389 in response to their hunger and satiety signals (but neither pressuring nor restricting  
390 their milk and food intake), during milk-feeding and complementary feeding; 145  
391 mothers were randomised to a control group. At one year significantly fewer infants  
392 in the intervention group were overweight (6%) compared to the control group (13%).  
393 These RCTs indicate that parental feeding behaviour can modify young children's  
394 eating behaviour and weight gain. However, these studies were conducted in infants  
395 and young preschool children so it is unclear whether these findings are  
396 generalisable to older children.

397

398 The genetic correlations between children's BMI and parental feeding behaviour  
399 were modest, and were far from complete (i.e. less than 1.0), indicating that other  
400 genetically-determined child characteristics are also influencing parental feeding  
401 behaviour. Children's appetite is under strong genetic control; twin studies –  
402 including this sample – have shown high heritability for appetite<sup>24,25</sup> and shared  
403 heritability with BMI<sup>26</sup>, and appetite is associated with the BMI GPS in this sample  
404 and has been shown to mediate part of the GPS-BMI association<sup>27</sup>. It is therefore  
405 likely that child appetite also influences parental feeding behaviour<sup>24,25</sup>. In support of  
406 this, prospective and within-family studies have provided evidence that within the  
407 context of parental feeding, parents respond not only to their child's weight but to

408 their eating styles too. A large prospective population-based study used bidirectional  
409 analyses to show that parents whose children were excessively fussy at baseline  
410 increased their pressure over time<sup>28</sup>. A reverse relationship also pertained, but the  
411 temporal association from child to parent was stronger. A large within-family study of  
412 preschool twins showed that parents varied their pressuring feeding style when their  
413 twins were discordant for food fussiness<sup>29</sup>. The fussier twin was pressured more  
414 than their co-twin, also in support of a child-driven model of parental feeding  
415 behaviour. It stands to reason that a child who is a picky eater is pressured, to try  
416 some of their vegetables or to eat more overall. Along the same lines, a natural  
417 response from a parent who has a child who shows a tendency toward excess intake  
418 and a relatively pronounced preference for foods rich in sugar or fat, is to enforce  
419 some restriction.

420

421 We also found a positive phenotypic correlation between ‘restriction’ and ‘pressure’  
422 ( $\beta = 0.15$ ), indicating that parents who exert higher levels of restriction on their  
423 children also tend to pressure them more. This suggests that some parents have a  
424 more controlling feeding style in general.

425

## 426 **Implications and future research**

427

428 The relationship between parental behaviour and children’s emerging characteristics  
429 appears to be reciprocal and complex. The current findings suggests that parents’  
430 feeding responses to child weight are to exert greater restriction of food intake on  
431 children with a higher BMI, and to pressure a thinner child to eat. However, these  
432 strategies may not be effective in the long run. RCTs have suggested that PFPs can

433 have a lasting and important impact on children's weight and eating behaviour in the  
434 early years, although whether or not these findings apply to older children has yet to  
435 be determined. It is well established that the genetic influence on the BMI in younger  
436 children is lower, and the shared environmental effect is higher, than in older  
437 children<sup>15,16</sup>. This suggests that parental influence diminishes as children grow older,  
438 gain independence and spend increasing time outside the home with peers rather  
439 than parents<sup>30</sup>. Large RCTs that follow children from early life to later childhood are  
440 needed to establish if PFPs influence the weight of older children.

441

#### 442 **Strengths & Limitations**

443

444 A strength of this study is that we used several genetically sensitive methodological  
445 approaches to explore the causal relationships between child BMI and PFPs,  
446 yielding consistent results. PFPs were measured using the Child Feeding  
447 Questionnaire, which has well established criterion and construct validity, as well as  
448 good internal and test-retest reliability<sup>31</sup>. This instrument has been used widely in  
449 previous research into child weight, allowing the findings from this study to be  
450 directly compared to a wealth of existing results.

451

452 A potential limitation is that heritability estimates from twin studies rely on the  
453 assumption that MZs and DZs share their environment in terms of the trait in  
454 question to the same extent, so-called the 'equal environments assumption'; if this is  
455 violated, the findings are invalid. Therefore if parents feed MZs more similarly than  
456 DZs simply because they are identical, this would artificially inflate the MZ correlation  
457 and, consequently, heritability. However, if MZs are fed more similarly than DZs

458 because parents are responding to their genetically determined BMI or traits that  
459 share genetic influence with BMI such as appetite, differences in feeding experience  
460 across MZs and DZs do not constitute a violation of the equal environments  
461 assumption because these differences in feeding practices are being driven by  
462 greater genetic similarity between MZs than DZs. In addition, if parents' reports of  
463 how similarly they fed their twins were biased by their perceived zygosity (i.e.  
464 reported treatment was not a true reflection of actual treatment, but related to the  
465 twins being MZ or DZ), this would also render the heritability estimates unreliable.  
466 However, this seems unlikely given previous findings that parents' reports about their  
467 twins' are not biased by their beliefs about their zygosity, using the 'mistaken  
468 zygosity' design<sup>32</sup>.

469

470 Another limitation was the lack of parental genotypes assessments. Parental BMI is  
471 by no means a perfect proxy for their genotypic predisposition to higher or lower  
472 BMI; the most powerful approach would be to have parental genotypes whereby the  
473 non-transmitted alleles from the parents (which relate to their own BMI and  
474 behaviour, but not to that of their child) can be entirely separated from the child's  
475 genotype. Nevertheless, the within-family analysis controlled for all family-level  
476 genetic and environmental effects, and the magnitudes of the relationships between  
477 child BMI and PFPs were unaffected. A further limitation is that we were unable to  
478 validate self-reported parental BMI, which may have been inaccurate and could  
479 potentially bias our results. Additionally, it may be possible that PFPs are largely  
480 explained by environmental factors that influence children's BMI. As the BMI GPS is  
481 not yet strong enough to be a sufficient proxy to separate genetic and environmental  
482 effects on child BMI, we were unable to test this question empirically. However,

483 considerable genetic correlations between child BMI and PFPs derived from the twin  
484 model renders this explanation unlikely. Lastly, BMI was only reported at one time  
485 point, but PFPs are likely to be driven by the child's emerging BMI throughout the  
486 developmental years. However, BMI-associated SNPs and BMI GPS are associated  
487 with weight gain trajectories from infancy throughout childhood, so the BMI GPS in  
488 fact captures a long window of child BMI<sup>14,33</sup>.

489

## 490 **Conclusion**

491

492 This study provides new evidence for gene-environment correlation in parental  
493 feeding practices. We have shown that parental feeding practices are substantially  
494 heritable and are elicited by the genes that influence children's BMI. Genome-wide  
495 polygenic scores that index children's genetic propensities for their BMI significantly  
496 predicted their parents' feeding practices, even after potentially confounding shared  
497 family effects were taken into account. The findings of this study provide a new  
498 perspective on the nature of the associations between parental feeding practices and  
499 child BMI.



## 500 Methods

501

### 502 Sample

503

504 Participants were from the Twins Early Development Study (TEDS). Between 1994-  
505 1996 TEDS recruited over 15,000 twin pairs born in England and Wales, who have  
506 been assessed in multiple waves across their development up until the present date.  
507 Despite some attrition, about 10,000 twin pairs still actively contribute to TEDS,  
508 providing genetic, cognitive, psychological and behavioural data. TEDS participants  
509 and their families are representative of families in the UK<sup>34</sup>. Written informed consent  
510 was obtained from parents before data collection began. Project approval was  
511 granted by King's College London's ethics committee for the Institute of Psychiatry,  
512 Psychology and Neuroscience (05.Q0706/228). This study included 4,445 unrelated  
513 individuals with genotyping for the GPS analysis, 2,164 genotyped dizygotic (DZ)  
514 twin pairs (1,151 same-sex DZ pairs, 1,013 opposite-sex DZ pairs), and 4,375 twin  
515 pairs for the twin analysis (1,636 monozygotic (MZ) pairs, 1,441 same-sex DZ pairs,  
516 and 1,298 opposite-sex DZ pairs).

517

### 518 Genotyping

519

520 Two different genotyping platforms were used because genotyping was undertaken  
521 in two separate waves, five years apart. AffymetrixGeneChip 6.0 SNP arrays were  
522 used to genotype 3,665 individuals at Affymetrix, Santa Clara (California, USA)  
523 based on buccal cell DNA samples. Genotypes were generated at the Wellcome

524 Trust Sanger Institute (Hinxton, UK) as part of the Wellcome Trust Case Control  
525 Consortium 2 (<https://www.wtccc.org.uk/cc2/>). Additionally, 8,122 individuals  
526 (including 3,607 dizygotic co-twin samples) were genotyped on  
527 HumanOmniExpressExome-8v1.2 arrays at the Molecular Genetics Laboratories of  
528 the Medical Research Council Social, Genetic Developmental Psychiatry Centre,  
529 using DNA that was extracted from saliva samples. After quality control, 635,269  
530 SNPs remained for AffymetrixGeneChip 6.0 genotypes, and 559,772 SNPs for  
531 HumanOmniExpressExome genotypes.

532

533 Genotypes from the two platforms were separately phased using EAGLE<sup>35</sup>, and  
534 imputed into the Haplotype Reference Consortium (release 1.1) through the Sanger  
535 Imputation Service03/09/2018 06:49:00 before merging genotype data from both  
536 platforms. Genotypes from a total of 10,346 samples (including 3,320 dizygotic twin  
537 pairs and 7,026 unrelated individuals) passed quality control, including 3,057  
538 individuals genotyped on Affymetrix and 7,289 individuals genotyped on Illumina.  
539 The final data contained 7,363,646 genotyped or well imputed SNPs (for more  
540 details, see Supplementary Methods S1).

541

542 We performed principal component analysis on a subset of 39,353 common (MAF >  
543 5%), perfectly imputed (info = 1) autosomal SNPs, after stringent pruning to remove  
544 markers in linkage disequilibrium ( $r^2 > 0.1$ ) and excluding high linkage disequilibrium  
545 genomic regions so as to ensure that only genome-wide effects were detected.

546

547 **Phenotypic measures**

548

549 The samples used for the analyses differed by necessity in order to accommodate  
550 the different methodological approaches: unrelated genotyped individuals (UG);  
551 dizygotic genotyped co-twins (DG); twin sample (TS) for quantitative genetic  
552 analysis. For the classical twin model approach, only phenotypic data from  
553 genotyped twins and their co-twins were selected for comparability across the study  
554 samples. Descriptive statistics for all phenotypic measures are reported in  
555 Supplementary Table S1a for unrelated genotyped individuals, in Supplementary  
556 Table S1b for genotyped DZ twin pairs and in Supplementary Table S1c for samples  
557 used for twin modelling.

558

559 Children's body mass index (BMI) was calculated from parent-reported weight (kg)  
560 divided by the square of parent-reported height (metres):  $\text{kg/m}^2$ . The 1990 UK  
561 growth reference data<sup>36</sup> were used to create BMI standard deviation scores (BMI-  
562 SDS) which take account of the child's age and sex, and represent the difference  
563 between a child's BMI and the mean BMI of the reference children of the same age  
564 and sex. BMI-SDS are used rather than BMI itself because BMI varies substantially  
565 by age and sex until early adulthood. Reference BMI-SDS have a mean of 0 and a  
566 SD of 1: a value greater than 0 indicates a higher BMI than the mean in 1990; a  
567 value less than 0 indicates a lower BMI than the mean in 1990. The validity of  
568 parent-reported height and weight was tested through home-visits of researchers in  
569 a subset of 228 families. Correlations between measurements taken by parents and  
570 researchers were high (height:  $r = 0.90$ ; weight:  $r = 0.83$ )<sup>37</sup>. BMI-SDS were available  
571 for 4,259 (UG), 4,134 (DG), and 8,406 (TS) individuals. Children had a mean age of  
572 9.91 years ( $SD=0.87$ ) when anthropometric measures were assessed.

573

574 Parental BMI was calculated for 4,112 individuals using self-reported weight (kg) and  
575 height (metres) of the responding parent ( $\text{kg/m}^2$ ), which was assessed at the same  
576 time as childhood height and weight. To account for the gender of the responding  
577 parent (97% mothers, 3% fathers), we used the z-standardized residuals of gender-  
578 corrected BMI in analyses.

579

580 To assess PFPs, we used the Child Feeding Questionnaire<sup>38</sup>, which parents  
581 completed when their twins were approximately 10 years old (mean=9.91 years,  
582  $SD=0.87$ ). To measure the degree to which parents restricted their children's food  
583 intake ('restriction'), we calculated a mean composite score based on 6 items  
584 (Cronbach's alpha = 0.78), such as "I intentionally keep some foods out of my child's  
585 reach", or "If I did not guide my child's eating, he/she would eat too many junk  
586 foods". Data were available for 4,386 (UG), 4,228 (DG) and 8,582 (TS) children.  
587 Similarly, we created a mean composite score to assess the amount of pressure  
588 parents exerted on their children to increase their food intake ('pressure'), including 4  
589 items (Cronbach's alpha = 0.61) such as "If my child says "I'm not hungry", I try to  
590 get him/her to eat anyway", or "I have to be especially careful to make sure my child  
591 eats enough". Data were available for 4,445 (UG), 4,328 (DG) and 8,750 (TS)  
592 children. All items were scored on a 5-point Likert scale (Disagree, Slightly disagree,  
593 Neutral, Slightly agree, Agree).

594

### 595 Phenotypic exclusions

596

597 For child and parent anthropometrics we removed extreme outliers with implausible  
598 values that were deemed to be errors. For children we excluded values based on the

599 following criteria:  $\pm 5$  standard deviations above or below the mean of height SDS,  
600 weight SDS or BMI-SDS; shorter than 105 cm or taller than 180cm; lighter than 12  
601 kg or heavier than 80 kg. After removing outliers, child BMI-SDS had a mean of 0  
602 and a standard deviation of 0.99, showing that the sample is representative of the  
603 UK reference population for BMI in 1990 (mean = 0; SD = 1). For parental BMI, we  
604 removed individuals with values that fell  $\pm 3.5$  standard deviations above or below  
605 the mean, as well as individuals that weighed below 35 kg. To account for the  
606 positive skew, we log transformed this variable. As all variables showed age or sex  
607 effects (described in Supplementary Table S1a, S1b, S1c), we controlled for these  
608 variables by applying the regression method, using z-standardized residuals for all  
609 further analyses. Supplementary Table S2a, S2b and S2c show descriptive statistics  
610 for all clean measures (regressed onto age and sex) in unrelated samples, for DZ  
611 twin pair samples, and individuals used for twin modelling, respectively.

612

613

## 614 Genotypic measures

615

616 We created Genome-wide Polygenic Scores (GPSs) for BMI, using summary  
617 statistics of the most powerful published genome-wide meta-analysis of BMI to date  
618 of 339,224 participants<sup>19</sup>. We calculated a GPS for each individual as the sum of the  
619 weighted count of BMI-increasing alleles:

620

$$GPS_{BMI} = \sum_{i=1}^k \beta_i SNP_i$$

621

622 where  $i \in \{1, 2, \dots, k\}$  and indexes  $SNP_i$  and the  $i$  number of the  $k$  BMI increasing  
623 alleles included in the score is determined by the  $p$ -value threshold of the SNP–  
624 phenotype association in the discovery GWAS, the  $\beta$ -coefficients for each respective  
625 genetic variant is used as a weight, and the count of each reference allele is  
626 represented by genotype dosage (0, 1, or 2 alleles) of  $SNP_i$ .

627

628 We used the software PRSice<sup>39</sup> to calculate GPS in our sample. To account for  
629 multicollinearity among SNPs in Linkage Disequilibrium (LD), which can upwardly  
630 bias GPS predictions<sup>40</sup>, genome-wide clumping was performed ( $r^2 = 0.1$ , kb = 250).  
631 Using the clumped, independent SNPs, we created eight GPS for 10,346 individuals  
632 (7,026 unrelated individuals; 3,320 DZ twin pairs) using increasingly liberal GWAS  $p$ -  
633 value thresholds ( $pT$ : 0.001, 0.05, 0.1, 0.2, 0.3, 0.4, 0.5, 1). Diagonals in Supplementary  
634 Fig S1 show the number of SNPs included in each respective GPS. As all thresholds  
635 performed similarly well (Supplementary Fig S1), we used a GPS based on the  
636 smallest  $p$ -value threshold of 0.001 for all further analyses. Potential effects due to  
637 population stratification and genotyping were accounted for by regressing the first  
638 ten principal components, and factors capturing genotyping information (microarray,  
639 batch and plate) onto the child BMI GPSs, subsequently using the z-standardised  
640 residuals in our analyses.

641

## 642 Statistical Analysis

643

### 644 Genome-wide Polygenic Score (GPS) analyses

645

#### 646 *Trait prediction in unrelated samples*

647

648 Associations between child BMI GPS and phenotypes were assessed using linear  
649 regression analyses. All variables were standardised prior to analyses, therefore  $\beta$   
650 coefficients from linear regression models are equivalent to Pearson's correlation  
651 coefficients.

652

653 *Accounting for family effects in unrelated samples and DZ twin pairs*

654

655 Children not only inherit half of each of their parent's DNA, but also the family  
656 environment. Therefore, it is possible that familial effects, both genetic and  
657 environmental, confound the relationships between child GPS and PFPs. To account  
658 for these potential confounding effects, we used two approaches. Firstly, we  
659 removed variance in the PFPs (restriction, pressure) explained by parental BMI in  
660 our sample of unrelated individuals using the regression method, and repeated  
661 association analyses. Secondly, we used data on genotyped DZ twin pairs to  
662 explicitly model the effect of within-DZ twin pair GPS differences on differences in  
663 PFPs by accounting for the family contributions in a fixed-effects model:

664

$$Y_{ij} = \alpha_j + \beta GPS_{ij} + e_{ij},$$

665

666 where  $i \in \{1,2\}$  indexes the individuals of the dizygotic twin pairs, and  $j \in \{1,2,\dots,k\}$   
667 indexes the  $k$  families (i.e. sets of dizygotic twin pairs). Thus,  $Y_{ij}$  is the trait value for  
668 the  $i$ th individual of the  $j$ th family,  $\alpha_j$  is a vector including the (fixed) family effects,  $\beta$  is  
669 the effect of the GPS within families,  $e_{ij}$  is the random error for each individual and  
670 each family with  $e_{ij} \sim N(0, \sigma^2)$ , and  $\text{Cov}(\alpha_j, e_{ij}) = 0$ . The family units were coded using

671 dummy variables in order to estimate the  $\alpha_j$  effects. By accounting for the differences  
672 in contributing factors between families via  $\alpha_j$ , this model tests for the effect of  
673 differences in GPS values between DZ twins on the outcome and therefore assesses  
674 the impact of GPS with shared genetic and shared environmental factors accounted  
675 for. The within-family associations indicate the extent to which parents vary their  
676 'restriction' or 'pressure' in response to differences in their twins' BMI GPS. A larger  
677 association indicates that the greater the difference between twin pairs' BMI GPS,  
678 the greater the difference in parental 'restriction' or 'pressure' across two twins in a  
679 pair. We applied fixed-effects models to our combined DZ data, and repeated these  
680 analyses using same-sex DZ pairs and opposite-sex DZ samples only.

681

## 682 Twin modelling

683

684 To obtain broad estimates of the extent to which individual differences in PFPs are  
685 determined by children's genotypes, we used a multivariate 'correlated factors' twin  
686 model. This allowed us to estimate: (1) the heritability of PFPs, which provided an  
687 indication of the extent to which PFPs are caused by children's genotypes in general;  
688 and (2) the extent of *common* genetic influence on both child BMI-SDS and PFPs,  
689 which provided an indication of the extent to which PFPs are caused by children's  
690 genetic propensity to higher or lower BMI, specifically.

691

692 Based on biometrical genetics theory<sup>41</sup>, it is possible to decompose variance in a  
693 single trait into three components: additive genetic (A; heritability), shared  
694 environmental (C; all environmental effects that make family members more similar)  
695 and non-shared environmental (E; all environmental effects that contribute to



696 dissimilarities across family members, including random error measurement). The  
697 basis of the method is to compare resemblance for a single trait between  
698 monozygotic (MZ) and dizygotic (DZ) twin pairs, who share 100% and 50% (on  
699 average) of their segregating genetic material, respectively, while both types of twins  
700 are correlated 100% for their shared environmental influence. The observed  
701 covariation between MZ and DZ pairs is compared with the expected covariation,  
702 based on the knowledge of different degrees of allele sharing (or identity by descent  
703 (IBD)) of MZ (IBD = 1.0) and DZ pairs (IBD = 0.5 on average). The twin method  
704 therefore assumes that MZ and DZ twins share their environments in terms of the  
705 trait in question to the same extent (so-called the 'equal environments assumption'),  
706 and the only difference between the two types of twins is the extent of their genetic  
707 relatedness.

708

709 Using the same principles, comparison of MZ and DZ covariation *across traits* (so-  
710 called cross-twin cross-trait covariance, e.g. the covariation between Twin 1 BMI-  
711 SDS and Twin 2 'restriction') provides an indication of the extent to which the genetic  
712 and environmental influences on multiple traits are the same. The key pieces of  
713 information provided are the aetiological correlations, which indicate the extent to  
714 which child BMI and PFPs are caused by the same additive genetic ('genetic  
715 correlation',  $r_A$ ), shared environmental ('shared environmental correlation',  $r_C$ ), and  
716 non-shared environmental influences ('non-shared environmental correlation',  $r_E$ ). In  
717 this analysis we were primarily interested in the genetic correlation, which indicates  
718 the extent to which the additive genetic influences on child BMI cause PFPs. The  
719 aetiological correlations range from -1 to 1 and can be interpreted similarly to  
720 Pearson's correlations. For example, a high *positive* genetic correlation between

721 'restriction' and BMI would indicate that many of the DNA variants that cause higher  
722 child BMI are the same as those cause *higher* levels of 'restriction', while a high  
723 *negative* genetic correlation would indicate that many of the DNA variants causing  
724 higher child BMI are the same as those causing *lower* levels of 'restriction'.

725

726 Maximum likelihood structural equation modelling was used to estimate intra-class  
727 correlations across the zygosity, the A, C and E parameter estimates and  
728 aetiological correlations (with 95% confidence intervals), and goodness-of-fit  
729 statistics. Sex differences in the parameter estimates were also tested for using a  
730 sex-limitation model. Analyses were implemented in the R package *OpenMx*<sup>42</sup>.

731 **Author Contributions:**

732 Study concept and design: SS, RP, CHL. Processed and quality controlled genotype

733 data: SS. Supervision of genotype quality control: JC. Analysis of data: SS.

734 Interpretation of data: SS, TAM, RP, CHL. Wrote the paper: SS, CHL. Contributed to

735 and critically reviewed the manuscript: All authors

736 **References**

737

- 738 1. Clark HR, Goyder E, Bissell P, Blank L, Peters J. How do parents' child-  
739 feeding behaviours influence child weight? Implications for childhood obesity  
740 policy. *J Public Health (Oxf)*. 2007 Jun;29(2):132–41.
- 741 2. Golan M. Parents as agents of change in childhood obesity - from research to  
742 practice. *Pediatric Obesity*. Blackwell Publishing Ltd; 2006 Jun 1;1(2):66–76.
- 743 3. Lindsay AC, Sussner KM, Kim J, Gortmaker S. The role of parents in  
744 preventing childhood obesity. *Future Child*. 2006;16(1):169–86.
- 745 4. Birch LL, Fisher JO. Development of Eating Behaviors Among Children and  
746 Adolescents. *Pediatrics*. American Academy of Pediatrics; 1998 Mar  
747 1;101(Supplement 2):539–49.
- 748 5. Birch LL, Fisher JO. Mothers' child-feeding practices influence daughters'  
749 eating and weight. *Am J Clin Nutr*. NIH Public Access; 2000 May;71(5):1054–  
750 61.
- 751 6. Batsell WR, Brown AS, Ansfield ME, Paschall GY. "You will eat all of that!": A  
752 retrospective analysis of forced consumption episodes. *Appetite*. 2002  
753 Jun;38(3):211–9.
- 754 7. Galloway AT, Fiorito LM, Francis LA, Birch LL. "Finish your soup":  
755 Counterproductive effects of pressuring children to eat on intake and affect.  
756 *Appetite*. Academic Press; 2006 May 1;46(3):318–23.

- 757 8. Shloim N, Edelson LR, Martin N, Hetherington MM. Parenting Styles, Feeding  
758 Styles, Feeding Practices, and Weight Status in 4-12 Year-Old Children: A  
759 Systematic Review of the Literature. *Front Psychol. Frontiers*; 2015;6:1849.
- 760 9. Afonso L, Lopes C, Severo M, Santos S, Real H, Durão C, et al. Bidirectional  
761 association between parental child-feeding practices and body mass index at 4  
762 and 7 y of age. *Am J Clin Nutr. Oxford University Press*; 2016 Mar  
763 1;103(3):861–7.
- 764 10. Derks IP, Tiemeier H, Sijbrands EJ, Nicholson JM, Voortman T, Verhulst FC,  
765 et al. Testing the direction of effects between child body composition and  
766 restrictive feeding practices: results from a population-based cohort. *Am J Clin  
767 Nutr. Oxford University Press*; 2017 Sep 1;106(3):783–90.
- 768 11. Jansen PW, Tharner A, van der Ende J, Wake M, Raat H, Hofman A, et al.  
769 Feeding practices and child weight: is the association bidirectional in preschool  
770 children? *Am J Clin Nutr. Oxford University Press*; 2014 Nov 1;100(5):1329–  
771 36.
- 772 12. Rhee KE, Coleman SM, Appugliese DP, Kaciroti NA, Corwyn RF, Davidson  
773 NS, et al. Maternal Feeding Practices Become More Controlling After and Not  
774 Before Excessive Rates of Weight Gain. *Obesity (Silver Spring). Blackwell  
775 Publishing Ltd*; 2009 Sep 1;17(9):1724–9.
- 776 13. Webber L, Cooke L, Hill C, Wardle J. Child adiposity and maternal feeding  
777 practices a longitudinal analysis. *Am J Clin Nutr.* 2010 Dec;92(6):1423–8.

- 778 14. Elks CE, Hoed den M, Zhao JH, Sharp SJ, Wareham NJ, Loos RJF, et al.  
779 Variability in the heritability of body mass index: a systematic review and meta-  
780 regression. *Front Endocrinol (Lausanne)*. Frontiers Media SA; 2012;3:29.
- 781 15. Silventoinen K, Jelenkovic A, Sund R, Hur Y-M, Yokoyama Y, Honda C, et al.  
782 Genetic and environmental effects on body mass index from infancy to the  
783 onset of adulthood: an individual-based pooled analysis of 45 twin cohorts  
784 participating in the COllaborative project of Development of Anthropometrical  
785 measures in Twins (CODATwins) study. *Am J Clin Nutr*. 2016;104(2):371–9.
- 786 16. Silventoinen K, Rokholm B, J Kaprio, Sørensen TIA. The genetic and  
787 environmental influences on childhood obesity: a systematic review of twin and  
788 adoption studies. *International Journal of Obesity*. Nature Publishing Group;  
789 2010 Jan 1;34(1):29–40.
- 790 17. McGuire S. The Heritability of Parenting. *Parenting: Science And Practice*.  
791 Lawrence Erlbaum Associates, Inc; 2003;3(1):73–94.
- 792 18. Avinun R, Knafo A. Parenting as a Reaction Evoked by Children's Genotype: A  
793 Meta-Analysis of Children-as-Twins Studies. *Personality and Social  
794 Psychology Review*. 4 ed. SAGE PublicationsSage CA: Los Angeles, CA;  
795 2014;18(1):87–102.
- 796 19. Locke AE, Kahali B, Berndt SI, Justice AE, Pers TH, Day FR, et al. Genetic  
797 studies of body mass index yield new insights for obesity biology. *Nature*.  
798 Nature Publishing Group; 2015;518(7538):197–U401.

- 799 20. Knafo A, Plomin R. Parental discipline and affection and children's prosocial  
800 behavior: genetic and environmental links. *J Pers Soc Psychol.* 2006  
801 Jan;90(1):147–64.
- 802 21. Daniels LA, Magarey A, Battistutta D, Nicholson JM, Farrell A, Davidson G, et  
803 al. The NOURISH randomised control trial: Positive feeding practices and food  
804 preferences in early childhood - a primary prevention program for childhood  
805 obesity. *BMC Public Health* 2009 9:1. BioMed Central; 2009 Dec 1;9(1):387.
- 806 22. Magarey A, Mauch C, Mallan K, Perry R, Elovaris R, Meedeniya J, et al. *Child*  
807 *Dietary and Eating Behavior Outcomes up to 3.5 Years After an Early Feeding*  
808 *Intervention: The NOURISH RCT.* Obesity (Silver Spring). 2016  
809 Jul;24(7):1537–45.
- 810 23. Paul IM, Williams JS, Anzman-Frasca S, Beiler JS, Makova KD, Marini ME, et  
811 al. The Intervention Nurses Start Infants Growing on Healthy Trajectories  
812 (INSIGHT) study. *BMC Pediatr.* 5 ed. BioMed Central; 2014;14(1).
- 813 24. Llewellyn CH, van Jaarsveld CHM, Johnson L, Carnell S, Wardle J. Nature  
814 and nurture in infant appetite: analysis of the Gemini twin birth cohort. *Am J*  
815 *Clin Nutr.* 2010;91(5):1172–9.
- 816 25. Carnell S, Haworth CMA, Plomin R, Wardle J. Genetic influence on appetite in  
817 children. *International Journal of Obesity.* Nature Publishing Group; 2008 Oct  
818 1;32(10):1468–73.
- 819 26. Llewellyn CH, van Jaarsveld CH, Plomin R, Fisher A, Wardle J. Inherited  
820 behavioral susceptibility to adiposity in infancy: a multivariate genetic analysis

- 821 of appetite and weight in the Gemini birth cohort. *Am J Clin Nutr.* Oxford  
822 University Press; 2012 Mar 1;95(3):633–9.
- 823 27. Llewellyn CH, Trzaskowski M, van Jaarsveld CHM, Plomin R, Wardle J.  
824 Satiety Mechanisms in Genetic Risk of Obesity. *JAMA Pediatr.* American  
825 Medical Association; 2014 Apr 1;168(4):338–44.
- 826 28. Jansen PW, de Barse LM, Jaddoe VWV, Verhulst FC, Franco OH, Tiemeier H.  
827 Bi-directional associations between child fussy eating and parents' pressure to  
828 eat: Who influences whom? *Physiol Behav.* 2017;176:101–6.
- 829 29. Harris HA, Fildes A, Mallan KM, Llewellyn CH. Maternal feeding practices and  
830 fussy eating in toddlerhood: a discordant twin analysis. *International Journal of*  
831 *Behavioral Nutrition and Physical Activity* 2016 13:1. 3rd ed. BioMed Central;  
832 2016 Dec 1;13(1):81.
- 833 30. Savage JS, Birch LL, Marini M, Anzman-Frasca S, Paul IM. Effect of the  
834 INSIGHT Responsive Parenting Intervention on Rapid Infant Weight Gain and  
835 Overweight Status at Age 1 Year A Randomized Clinical Trial. *JAMA Pediatr.*  
836 American Medical Association; 2016 Aug;170(8):742–9.
- 837 31. Vaughn AE, Tabak RG, Bryant MJ, Ward DS. Measuring parent food  
838 practices: a systematic review of existing measures and examination of  
839 instruments. *International Journal of Behavioral Nutrition and Physical Activity*  
840 2016 13:1. BioMed Central; 2013;10(1).
- 841 32. Herle M, Fildes A, van Jaarsveld C, Rijdsdijk F, Llewellyn CH. Parental Reports  
842 of Infant and Child Eating Behaviors are not Affected by Their Beliefs About  
843 Their Twins' Zygosity. *Behav Genet.* Springer US; 2016 Nov;46(6):763–71.



- 844 33. Hardy R, Wills AK, Wong A, Elks CE, Wareham NJ, Loos RJF, et al. Life  
845 course variations in the associations between FTO and MC4R gene variants  
846 and body size. *Hum Mol Genet.* 2010;19(3):545–52.
- 847 34. Haworth CMA, Davis OSP, Plomin R. *Twins Early Development Study (TEDS):  
848 A Genetically Sensitive Investigation of Cognitive and Behavioral Development  
849 From Childhood to Young Adulthood.* *Twin Res Hum Genet.* Cambridge  
850 University Press; 2013 Feb;16(1):117–25.
- 851 35. Loh P-R, Danecek P, Palamara PF, Fuchsberger C, A Reshef Y, K Finucane  
852 H, et al. Reference-based phasing using the Haplotype Reference Consortium  
853 panel. *Nat Genet.* 2016 Nov;48(11):1443–8.
- 854 36. Cole TJ, Freeman JV, Preece MA. Body mass index reference curves for the  
855 UK, 1990. *Archives of Disease in Childhood.* 1995;73(1):25–9.
- 856 37. Wardle J, Carnell S, Haworth CMA, Plomin R. Evidence for a strong genetic  
857 influence on childhood adiposity despite the force of the obesogenic  
858 environment. *Am J Clin Nutr.* 5 ed. 2008 Feb;87(2):398–404.
- 859 38. Birch LL, Fisher JO, Grimm-Thomas K, Markey CN, Sawyer R, Johnson SL.  
860 Confirmatory factor analysis of the Child Feeding Questionnaire: a measure of  
861 parental attitudes, beliefs and practices about child feeding and obesity  
862 proneness. *Appetite.* Academic Press; 2001 Jun 1;36(3):201–10.
- 863 39. Euesden J, Lewis CM, O'Reilly PF. PRSice: Polygenic Risk Score software.  
864 *Bioinformatics.* 2015 May 1;31(9):1466–8.

- 865 40. Palla L, Dudbridge F. A Fast Method that Uses Polygenic Scores to Estimate  
866 the Variance Explained by Genome-wide Marker Panels and the Proportion of  
867 Variants Affecting a Trait. *Am J Hum Genet.* 2015;97(2):250–9.
- 868 41. Mather K, Jinks JL. Introduction to biometrical genetics. Cornell Univ Pr; 1977.  
869 1 p.
- 870 42. Boker S, Neale M, Maes H, Wilde M, Spiegel M, Brick T, et al. OpenMx: An  
871 Open Source Extended Structural Equation Modeling Framework.
